# Supplementary material for: Birth of Four Chimeric Plastid Gene Clusters in Japanese Umbrella Pine
Source: PubMed Central journal article supplement — Genome Biol Evol. 2016 Jun 6;8(6):1776–84. doi: 10.1093/gbe/evw109 (PMC4943181; doi:10.1093/gbe/evw109), 2016-06-06
Supplement: supp_evw109_all_supplement_427.pdf [file supp_evw109_all_supplement_427.pdf]

Figure S1

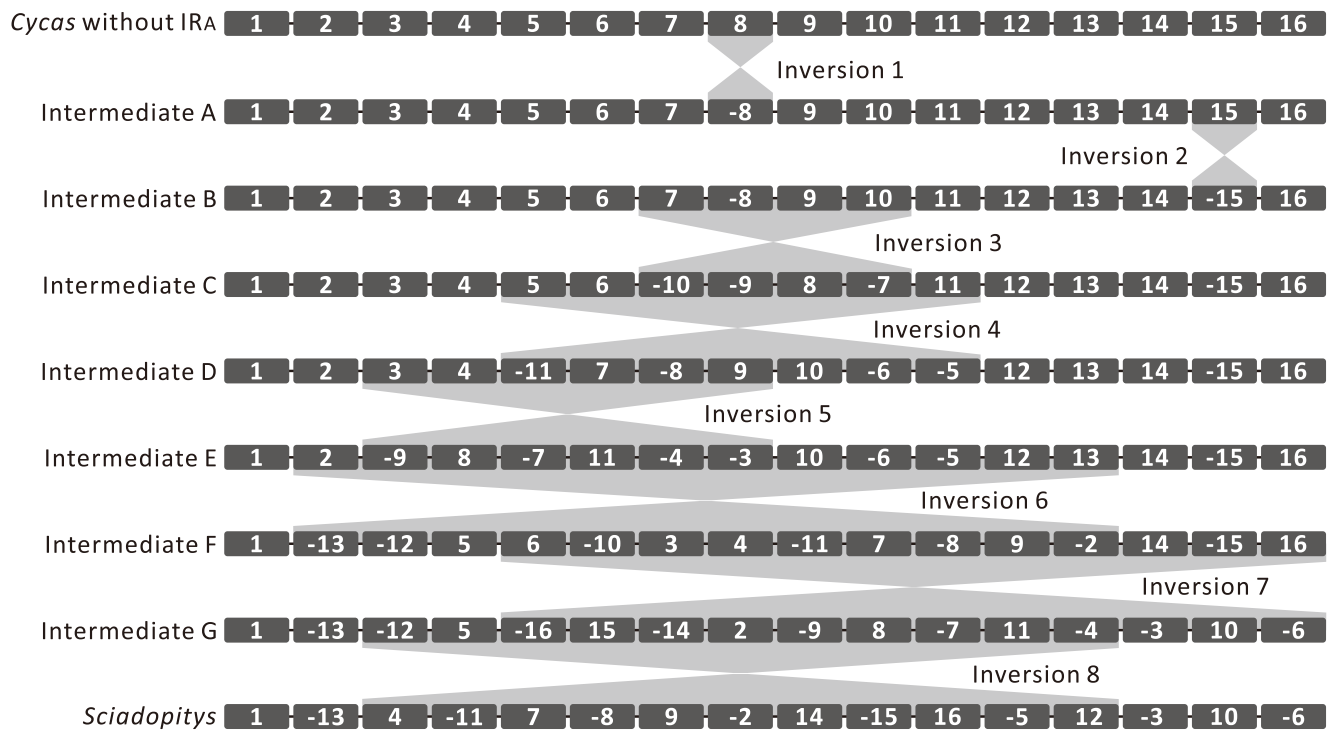

Table S1. Primers used in this study

| Primer name | Primer sequence (5'--->3')        |
|-------------|-----------------------------------|
| rpoC2       | TCATTCCAAATTGATTTATAAATCTGGTA     |
| rpl33       | ACAAACATACCATTACCGGAGAAATA        |
| rpoC1       | AAAATAATATTGTTTCCTATAATAAACCTTCG  |
| rps18       | TTGGTCGCGGACGTTTACG               |
| psbB-2      | TAGTCCGAGGGGTTGGTTTACTT           |
| atpA-2      | ACTAATCCCCTGCCATTACTTGAT          |
| psbT        | TTTTCTCCTCTATCCGGAACCTTG          |
| atpF-1      | AGAATTCAAAGAATGAGACCATTCACT       |
| SpsbN       | ATATCTCGTTTACTTGTAAGCTTACTGGTT    |
| SatpA       | TTTTCTCGAAGTAGGAAAAGTTCGATAT      |
| SrpoC2      | CTATTTTTTTACTTGTCGTTTCAAATTTG     |
| Srps18      | TTACTTAGCTTTACCTTTAAAATAAAAAGAGGT |

Table S2. Genes predicted in the plastome of *Sciadopitys*

| Functional category     | Gene <sup>1</sup>                                                                                                                                                                                                                                                                                                                      |
|-------------------------|----------------------------------------------------------------------------------------------------------------------------------------------------------------------------------------------------------------------------------------------------------------------------------------------------------------------------------------|
| Photosynthesis-related  |                                                                                                                                                                                                                                                                                                                                        |
| Photosystem I & II      | <i>psaA, psaB, psaC, psal, psaJ, psaM, psbA, psbB, psbC, psbD, psbE, psbF, psbH, psbI, psbJ, psbK, psbL, psbM, psbN, psbT, psbZ</i>                                                                                                                                                                                                    |
| ATPase                  | <i>atpA, atpB, atpE, *atpF, atpH, atpI</i>                                                                                                                                                                                                                                                                                             |
| Cytochrome b6/f complex | <i>petA, *petB, *petD, petG, petL, petN,</i>                                                                                                                                                                                                                                                                                           |
| NADH dehydrogenase      | <i>*ndhA, *ndhB, ndhC, ndhD, ndhE, ndhF, ndhG, ndhH, ndhI, ndhJ, ndhK</i>                                                                                                                                                                                                                                                              |
| RuBisCO synthesis       | <i>rbcL</i>                                                                                                                                                                                                                                                                                                                            |
| Gene expression         |                                                                                                                                                                                                                                                                                                                                        |
| Ribosomal protein       | <i>*rpl2, rpl14, *rpl16, rpl20, rpl22, rpl23, rpl32, rpl33, rpl36, rps2, rps3, rps4, rps7, rps8, rps11, 5'rps12, *3'rps12, rps14, rps15, *rps16, rps18, rps19</i>                                                                                                                                                                      |
| RNA polymerase          | <i>rpoA, rpoB, rpoC1, rpoC2</i>                                                                                                                                                                                                                                                                                                        |
| RNA structural gene     |                                                                                                                                                                                                                                                                                                                                        |
| Ribosomal RNA           | <i>rrn4.5, rrn5×2, rrn16, rrn23</i>                                                                                                                                                                                                                                                                                                    |
| Transfer RNA            | <i>*trnA-UAC, trnC-GCA, trnD-GUC, trnE-UUC, trnF-GAA, trnFM-CAU, trnG-GCC, *trnG-UCC, trnH-GUG, trnI-CAU×2, *trnI-GAU, *trnK-UUU, trnL-CAA, *trnL-UAA, trnL-UAG, trnM-CAU, trnN-GUU, trnP-UGG, trnQ-UUG×2, trnR-ACG, trnR-CCG, trnR-UCU, trnS-GCU, trnS-GGA, trnS-UGA, trnT-GGU, trnT-UGU, trnV-GAC, *trnV-UAC, trnW-CCA, trnY-GUA</i> |
| Other                   | <i>ccsA, cemA, chlB, chlL, chlN, clpP, infA, matK, ycf1, ycf2, *ycf3, ycf4</i>                                                                                                                                                                                                                                                         |
| Pseudogene              | <i>ΨrpoC1, ΨtrnV-GAC, ΨtrnP-GGG×2, ΨtrnQ-UUG</i>                                                                                                                                                                                                                                                                                       |

<sup>1</sup>"\*": intron-containing genes; "×2": two copies
